# Supplementary material for: Impact of experiencing specific side-effects on contraceptive switching and discontinuation in Uganda: Results from a longitudinal PMA Survey
Source: Research Square preprint supplement (doi:10.21203/rs.3.rs-47447/v2), 2020-11-06
Supplement: Supplementary file 1 [file 06365238d623aaa704bbabfe.docx]

Table 4: Adjusted relative risk of discontinuing and switching after adjusting for relevant background characteristics.
